# Supplementary material for: Efficient and relevant stepwise covariate model building for pharmacometrics
Source: PubMed Central journal article supplement — CPT Pharmacometrics Syst Pharmacol. 2022 Jul 19;11(9):1210–22. doi: 10.1002/psp4.12838 (PMC9469697; doi:10.1002/psp4.12838), 2022-07-19
Supplement: PSP4-11-1210-s002.pdf [file PSP4-11-1210-s002.pdf]

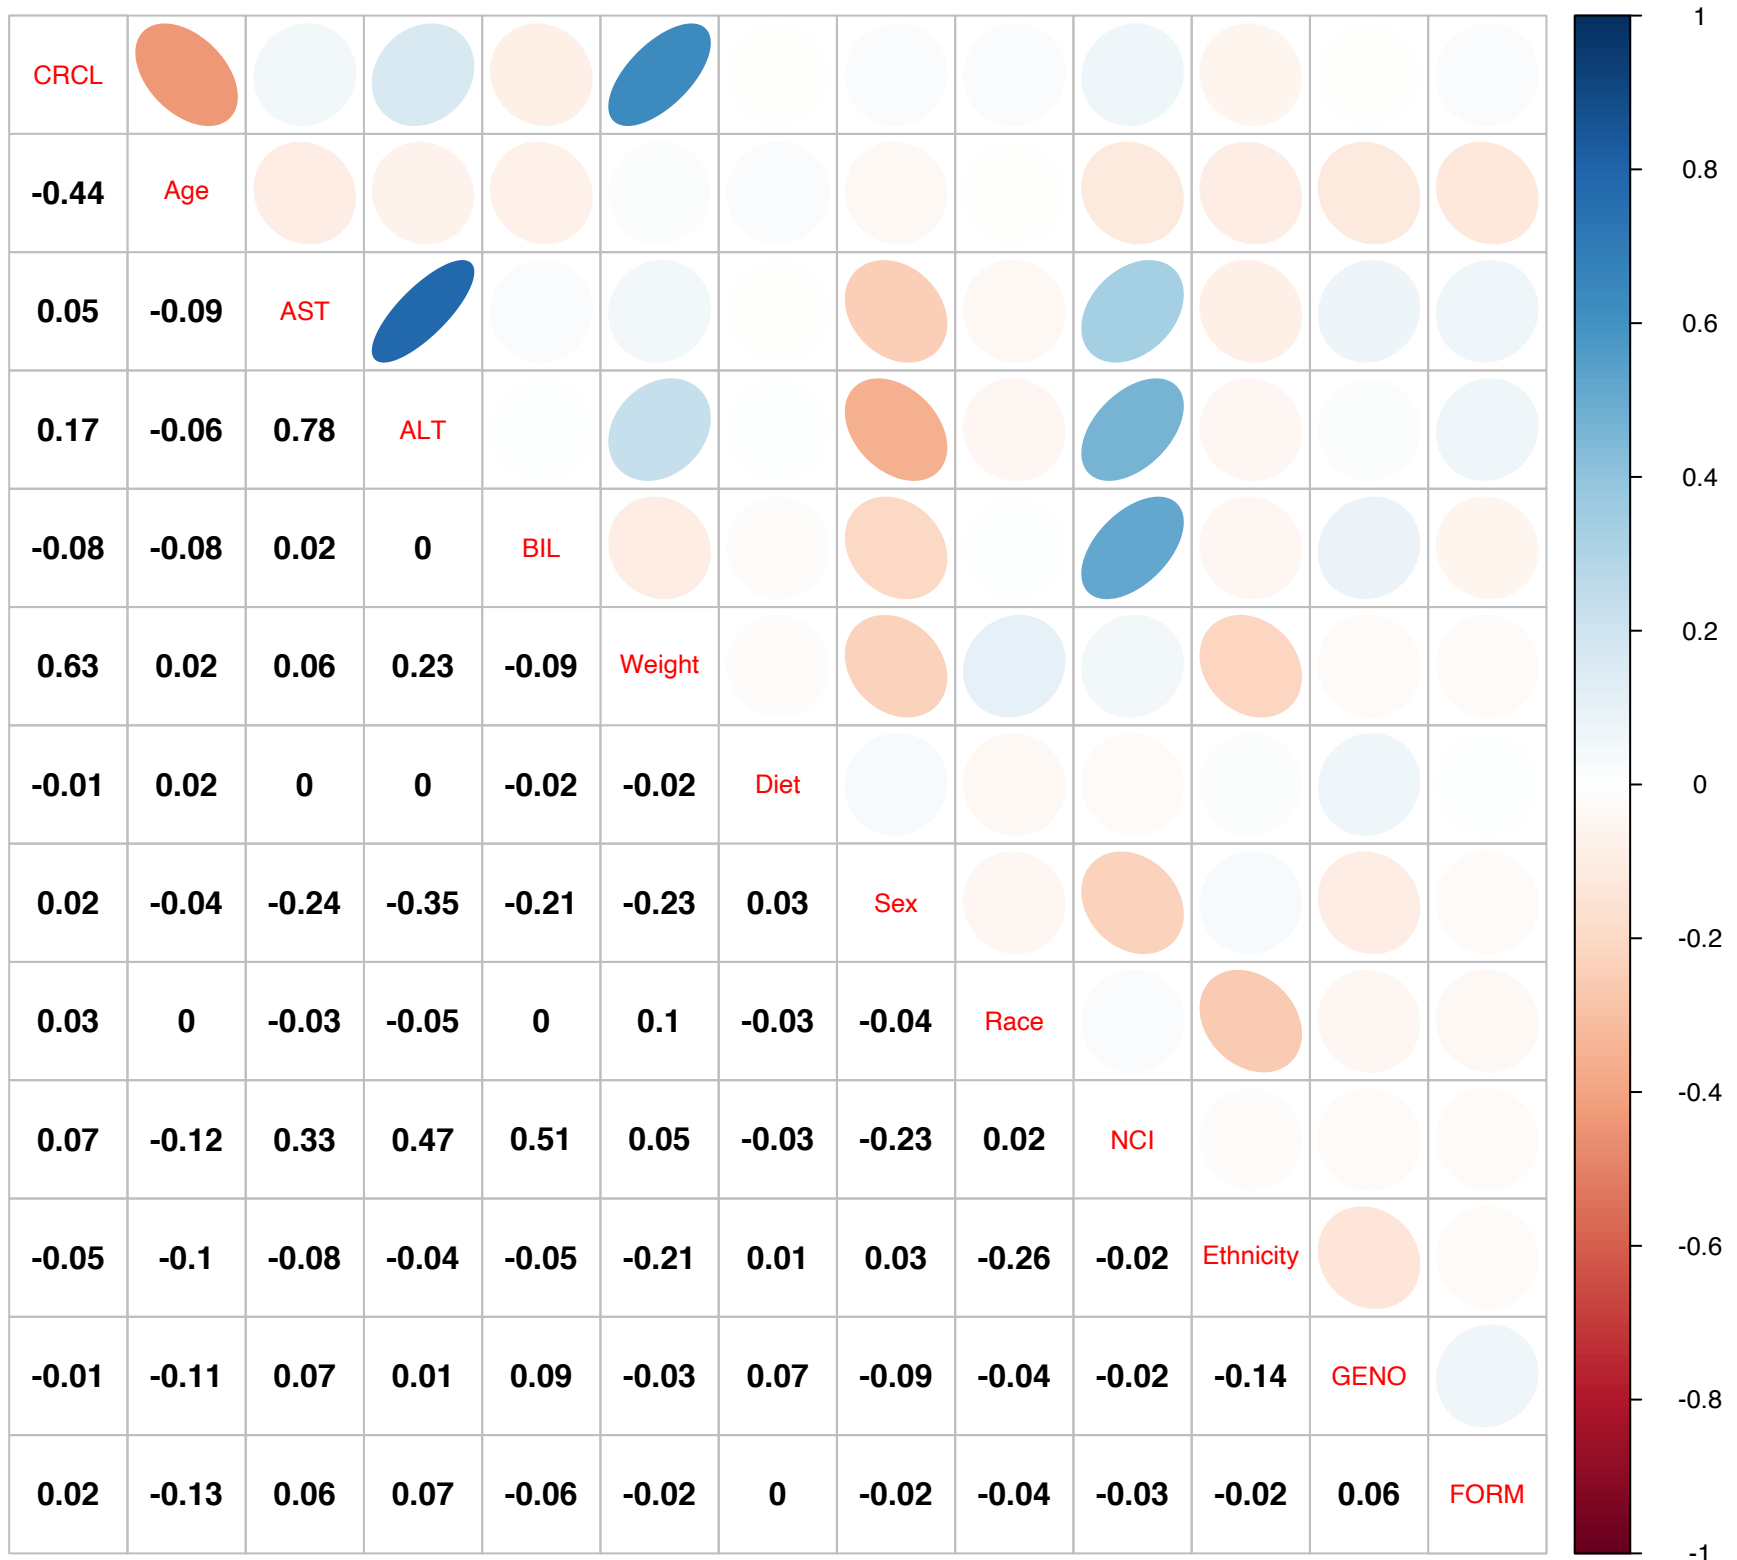

Figure S2. Correlation matrix of covariates at baseline, for the subjects from all simulated datasets. All covariates (continuous and categorical) are treated as continuous where females were assigned the value 2 and males were assigned the value 1. The correlation coefficients, presented in the lower left triangle, are visualized as ellipses in the upper right triangle, with the ellipse width corresponding to 1 minus the absolute value of the correlation coefficient, and the ellipse slope indicating a positive or negative correlation.
