# Supplementary material for: Efficient and relevant stepwise covariate model building for pharmacometrics
Source: PubMed Central journal article supplement — CPT Pharmacometrics Syst Pharmacol. 2022 Jul 19;11(9):1210–22. doi: 10.1002/psp4.12838 (PMC9469697; doi:10.1002/psp4.12838), 2022-07-19
Supplement: PSP4-11-1210-s003.pdf [file PSP4-11-1210-s003.pdf]

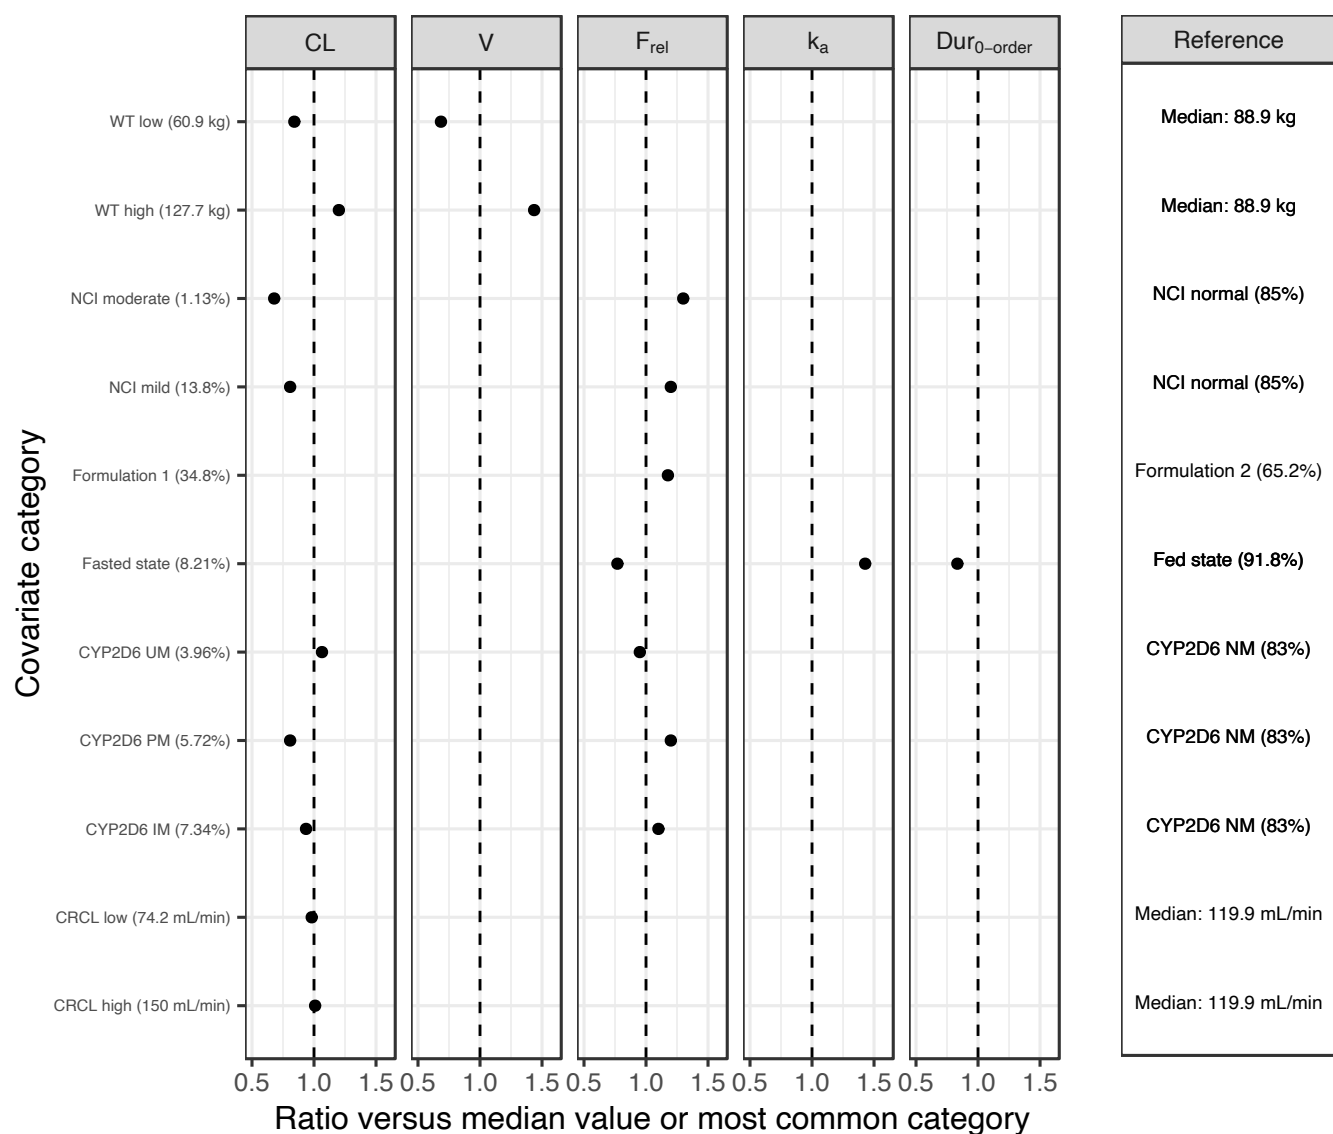

Figure S1. Graphical representation of the strength of simulated covariate-parameter relationships, stratified by parameter. For categorical covariates, the ratio between the typical parameter value of each category and that of the most common category is shown. For continuous covariates, low and high extremes (respectively labelled “low” and “high”) are used to calculate the ratio to the median value. The frequency of each category across all simulated datasets is shown as percentage on the y-axis text. For continuous covariates, the y-axis text shows the extreme values (respectively the 5th and 95th percentiles). The reference panel reports the median (for each continuous covariate) or the most common category (for each categorical covariate) across all simulated datasets. The plot only shows covariates included in the covariate-parameter relationships of the simulation model.
